# Supplementary material for: Adaptation in cone photoreceptors contributes to an unexpected insensitivity of primate On parasol retinal ganglion cells to spatial structure in natural images
Source: eLife. 2022 Mar 14;11:e70611. doi: 10.7554/eLife.70611 (PMC8956286; doi:10.7554/eLife.70611)
Supplement: Figure 1—source data 1. [file elife-70611-fig1-data1.xlsx]

## Sheet: Sheet1
Figure 1B
Contrast	F2/F1_spikes
0.125	0.154321
0.25	0.196185
0.5	0.226282
0.75	0.23556
0.9	0.260584
contrast	F2/F1_exc
0.125	0.116752
0.25	0.178762
0.5	0.193306
0.75	0.20225
0.9	0.205133
