# Supplementary material for: Adaptation in cone photoreceptors contributes to an unexpected insensitivity of primate On parasol retinal ganglion cells to spatial structure in natural images
Source: eLife. 2022 Mar 14;11:e70611. doi: 10.7554/eLife.70611 (PMC8956286; doi:10.7554/eLife.70611)
Supplement: Figure 2—source data 1. [file elife-70611-fig2-data1.xlsx]

## Sheet: Sheet1
Figure 2A			Figure 2B			Figure 2C			Figure 2D			Figure 2E			Figure 2F
Spike_count_image	Spike_count_disc		Exc_image	Exc_disc		Inh_image	Inh_disc		NLIExc	NLISpikes		meanNLIExc	meanNLInh		meanExcNLI	meanIERatio
-0.25	-0.75		-1.73486	-0.0713974		23.9367	0.997772		0.007	-0.143		-0.1063	-0.0504		-0.0761	0.7398
0.25	0		-0.236	0.338142		3.81479	1.85753		0.23	0.077		0.1054	0.0597		0.1095	0.6171
0	0.25		2.90424	0.471928		34.9185	1.37292		0.24	0.2		0.3771	0.2629		0.3876	1.2097
0	0.25		0.159827	0.786871		-10.1691	-1.81877		0.09	-0.096		0.6183	0.3496		0.5868	3.8747
0	-0.75		-1.0736	0.00422129		6.02724	-1.58247		0.29	0.155		0.8683	0.5137		0.8551	5.5904
1.5	0.5		1.8621	0.175879		59.5531	-4.19426		0.089	-0.04
0	0.5		0.816742	0.716216		152.066	2.38922		0.48	-0.02
0	0		-1.2626	0.252858		13.006	-4.32713		0.54	0.55
0	0.75		1.08533	-0.0101052		75.3587	-2.81623		0.27	0.25
-0.5	0.25		6.98902	0.844192		184.939	0.672097		0.236	-0.127
0.25	0.25		1.00823	-0.604404		96.4319	-1.24852
0.25	1		1.60145	0.0377122		-1.46975	-4.84709
0.25	0.25		0.593823	0.825305		-9.54251	-11.5523
0.75	1		2.07042	0.142022		15.3397	0.439804
1.5	0.5		2.28637	1.02371		-0.797786	-1.70587
1.25	0.5		8.9926	1.92837		133.083	-9.70081
1.25	1		2.17988	0.797169		30.8338	-1.18508
0.75	1.25		10.4079	1.03694		136.155	-0.861833
3	2.75		19.4695	2.35331		110.357	-0.606799
0.75	1.75		14.6925	2.09784		161.601	9.47539
2.25	3		2.861	2.95436		-3.18083	-0.0346849
2.5	2.25		22.147	3.71094		94.3946	-2.70327
3.75	3		14.8024	3.53577		5.98084	-1.4155
4	3.75		17.944	9.13412		1.35098	-0.620574
5.25	3.5		15.8108	15.6145		-2.96842	0.697865
9.25	7.5		48.977	21.0149		6.75322	-1.26509
6	6		13.6689	22.0065		2.78121	-2.23903
11.5	11.25		59.6014	57.2451		12.43	23.7236
9.5	12		74.8166	71.8619		55.5419	25.5365
9.75	10.75		47.7049	56.397		26.4179	22.6511
						l001_x_group2
						1.35098
						-2.96842
						6.75322
						2.78121
						12.43
						55.5419
						26.4179
						l001_x_group3
						23.9367
						3.81479
						34.9185
						-10.1691
						6.02724
						59.5531
						13.006
						-1.46975
						-9.54251
						15.3397
						30.8338
						-3.18083
