# Supplementary material for: Adaptation in cone photoreceptors contributes to an unexpected insensitivity of primate On parasol retinal ganglion cells to spatial structure in natural images
Source: eLife. 2022 Mar 14;11:e70611. doi: 10.7554/eLife.70611 (PMC8956286; doi:10.7554/eLife.70611)
Supplement: Figure 3—source data 1. [file elife-70611-fig3-data1.xlsx]

## Sheet: Sheet1
Figure 3B			Figure 3C_bottom							Figure 3C_top			Figure 3D_bottom			Figure 3D_top
cluster1_image	cluster1_disc		cluster1_x	cluster1_y	cluster2_x	cluster2_y	cluster3_x	cluster3_y		cluster1_x	cluster1_y		NLI_cluster1	NLI_cluster3		image_cluster1	disc_cluster1
143.695	129.582		0.233	1.05834	0.0991137	149.648	0.0157351	23.0119		0.587912	14.1123		0.143256	0.73931		139.644	132.93
136.419	163.528		0.537487	7.36256	0.120895	78.211	0.0601975	2.00026		0.662999	-27.1092		0.262068	0.469951		143.934	145.874
174.068	150.528		0.634541	1.95985	0.123388	184.108	0.0688884	33.5292		0.671934	23.5408		0.0195854	0.0516733		168.124	151.033
296.599	242.83		0.69779	-3.64989	0.129215	97.6432	0.0785036	-8.33187		0.94747	53.7693		0.0191177	0.872826		210.986	201.565
260.758	264.392		0.863415	8.06426	0.264708	142.633	0.0797336	7.67367		1.12096	-3.63459		0.0267647	0.153935		232.949	232.36
			0.88503	4.98958	0.329308	136.752	0.0821988	63.7424					0.0492773	0.156057
cluster2_image	cluster2_disc		1.36361	-11.2769	0.375447	110.91	0.100885	17.4635		cluster2_x	cluster2_y					image_cluster2	disc_cluster2
146.48	27.5586		1.3986	30.092	0.387048	152.034	0.154184	3.36526		-0.0394714	118.921					10.9051	-8.99429
16.9912	-2.5011		1.5308	3.83064	0.496986	97.0126	0.19035	1.93202		0.028061	19.4923					20.9681	-8.24775
57.8016	-4.48898		0.431634	-27.0936	-0.0394714	118.921	0.198687	14.8624		0.029331	62.2905					4.76134	-5.34872
83.4175	1.959		0.540529	-24.1156	0.028061	19.4923	0.297349	31.8589		0.0689371	81.4585					5.26517	-6.47751
161.504	6.58855		0.585627	-2.42405	0.029331	62.2905	0.49048	-3.13581		0.0929159	154.915					15.7542	6.36853
20.3148	9.88047		0.639185	9.79716	0.0689371	81.4585	-0.0151227	15.8237		0.10451	10.4343					35.7456	8.42629
20.8207	1.18057		0.834555	17.4102	0.0929159	154.915	-0.0130802	-30.4149		0.107162	19.6402					30.622	13.7425
10.0988	-2.58569		1.06752	103.056	0.10451	10.4343	0.00117383	171.988		0.109111	12.6845					37.1234	18.2483
15.0128	7.31157		0.195969	7.48618	0.107162	19.6402	0.0118443	385.644		0.111368	7.70122					15.9943	20.6668
142.549	8.14389		0.231762	28.5073	0.109111	12.6845	0.015179	303.276		0.124812	134.405					21.884	18.197
141.82	5.67326		0.245787	124.217	0.111368	7.70122	0.0213186	79.4047		0.136503	136.147					23.7683	22.7428
2.92008	11.1733		0.261847	30.6172	0.124812	134.405	0.0496497	232.312		0.158468	-8.25318					31.2224	23.8067
98.4924	10.561		0.264435	-4.5751	0.136503	136.147	0.0602887	295.194		0.168202	87.9314					38.4957	31.2763
29.4799	13.0094		0.268714	8.94484	0.158468	-8.25318	0.0703643	212.572		0.201569	16.4706					29.6027	26.9684
21.0666	8.11473		0.309884	8.53976	0.168202	87.9314	0.0726197	161.351		0.222362	12.9518					23.8281	29.5755
30.9411	17.2663		0.587912	14.1123	0.201569	16.4706	0.0772274	3.31792		0.224735	13.6748					46.7595	32.0949
47.2898	17.877		0.662999	-27.1092	0.222362	12.9518	0.0903705	36.6199		0.23758	29.4128					40.5764	41.7312
27.893	26.8037		0.671934	23.5408	0.224735	13.6748	0.103919	129.898		0.25617	1.08925					37.5506	35.8864
56.0066	36.5308		0.94747	53.7693	0.23758	29.4128	0.116833	311.851		0.258126	19.4758					45.9656	38.1963
79.2408	41.6578		1.12096	-3.63459	0.25617	1.08925	0.122273	28.1281		0.299859	37.5829					62.6041	48.9844
153.855	39.4486		0.238647	9.50692	0.258126	19.4758	0.130145	-19.8359		0.329911	114.406					51.6722	47.6302
50.9585	59.5307		0.264315	4.8079	0.299859	37.5829	0.183199	25.6762		0.344299	-8.57213					67.0051	51.4563
			0.446148	-2.22049	0.329911	114.406	-0.097395	341.059								68.0438	62.2403
cluster3_image		cluster3_disc	0.525957	3.91262	0.344299	-8.57213	-0.0470011	292.975		cluster3_x	cluster3_y					61.0359	76.0597
368.807	27.748		0.584528	0.269701	-0.0215421	39.6584	0.0403762	297.122		-0.097395	341.059					79.6146	78.4437
304.983	12.0079		0.644107	1.69396	-0.00819565	10.5532	0.00795435	86.6164		-0.0470011	292.975					139.644	132.93
295.849	-1.27324		0.817183	16.7657	0.069993	14.4	0.00970776	46.3665		0.0403762	297.122					143.934	145.874
			1.06404	3.21056	0.0836464	11.303	0.0233681	50.245								168.124	151.033
			-0.0184194	1.32993	0.113888	41.4015	0.0246762	17.9838								210.986	201.565
			-0.0107658	1.75213	0.132796	40.0243	0.0451051	27.5397								232.949	232.36
			0.045387	5.81364	0.170696	19.2034	0.109906	12.4782
			0.0645851	3.87241	0.199364	-1.90001	0.113946	22.7754
			0.0651272	25.7141	0.216442	96.8981	0.222134	7.40666								image_cluster3		disc_cluster3
			0.0726928	3.38602	0.264138	28.6483	0.00554893	183.539								10.9051	-8.99429
			0.0861394	-0.584651	0.266416	-0.824594	0.0148152	205.92								20.9681	-8.24775
			0.119967	-1.78714	0.273947	16.8409	0.0266019	152.454								35.7456	8.42629
			0.128951	-10.32	0.316857	2.37908	0.0282022	179.801
			0.175323	5.49961	-0.012702	54.1514	0.0361223	206.63
			0.198068	-2.2754	0.0342179	52.6712	0.0428692	143.99
			0.267248	-0.238247	0.0495616	37.0482	0.0598908	138.556
			0.26945	4.31943	0.0683033	40.6083	0.0620619	189.85
			0.314275	4.58362	0.0933157	66.6124	0.11209	177.743
			0.454686	10.0962	0.109346	58.0603	0.113359	159.627
			0.517253	12.6745	0.121437	59.3851	0.234445	124.416
			0.583709	35.4844	0.162848	34.5515	-0.016549	21.5505
			0.646966	25.3382	0.165419	59.8584	-0.00345246	14.947
			0.806889	18.9983	0.184741	52.7776	-5.36644e-05	1.53563
			1.06183	1.97035							0.000891639	-1.94324
			0.227016	-1.02867							0.00311579	14.2374
			0.277221	8.86851							0.00799293	7.53014
			0.325155	12.5832							0.0164812	2.4694
			0.365492	1.07561							0.0285763	1.19415
															0.0337203	1.85396
															0.0666136	27.5859
															0.104087	13.5584
															0.115048	13.4751
															0.115416	6.33358
															0.137204	4.79592
															0.143007	2.13222
															0.178111	0.856112
