# Supplementary material for: Adaptation in cone photoreceptors contributes to an unexpected insensitivity of primate On parasol retinal ganglion cells to spatial structure in natural images
Source: eLife. 2022 Mar 14;11:e70611. doi: 10.7554/eLife.70611 (PMC8956286; doi:10.7554/eLife.70611)
Supplement: Figure 5—source data 1. [file elife-70611-fig5-data1.xlsx]

## Sheet: Sheet1
Figure 5B			Figure 5C			Figure 5D
spike_count_onset	spike_count_offset		half_cycle	IE Ratio		half_cycle	norm_IERatio
-10.3947	58.355		1	6.06295		1	1.66276
-12.0855	57.9009		2	3.67384		2	0.888236
27.0009	36.1126		3	3.62753		3	0.816546
-0.655782	91.7224		4	4.1132		4	0.967288
-7.92837	65.8024		5	4.14497		5	1.02549
5.40388	42.0776		6	4.16193		6	1.00278
-2.68839	49.3732		7	4.37419		7	1.01847
			8	4.19081		8	0.985966
IERatio_onset		IERatio_offset
8.50069	3.42094		half_cycle	sps/s		half_cycle	norm_sp/s
8.73407	0.782748		1	4.91246		1	0.180794
8.56854	5.87367		2	133.183		2	1.03114
6.71134	2.93495		3	136.34		3	1.20118
8.14935	4.77098		4	112.024		4	1.07494
4.16123	3.48482		5	113.349		5	0.962532
13.6692	3.42745		6	103.87		6	1.0326
			7	98.9596		7	0.92551
ExcT1/2_onset	InhT1/2_onset		8	94.0286		8	1.00442
47.4	36.3
46	32.8
44.4	25.4
35.5	29.9
38.8	27.7
37.8	26.8
37.9	36.2
ExcT1/2_offset	InhT1/2_offset
58.7	53.1
52.9	54.4
40.8	32.3
42.4	49.4
39.8	41
40	38.8
49.5	64.8
