# Supplementary material for: Adaptation in cone photoreceptors contributes to an unexpected insensitivity of primate On parasol retinal ganglion cells to spatial structure in natural images
Source: eLife. 2022 Mar 14;11:e70611. doi: 10.7554/eLife.70611 (PMC8956286; doi:10.7554/eLife.70611)
Supplement: Figure 7—source data 1. [file elife-70611-fig7-data1.xlsx]

## Sheet: Sheet1
Figure 7B			Figure 7D
First/second_orig_stim	First/second_transformed_stim		half_cycle	orig_IERatio	trans_IERatio
0.950451	0.880737		1	1.69098	1.08752
0.845131	1.15779		2	0.908403	1.02881
0.796298	0.923597		3	0.846567	0.910907
0.89694	0.908673		4	0.985095	0.980589
0.869883	0.944927		5	1.01041	0.995357
0.694747	1.09794		6	1.0081	1.02017
0.828032	0.968906		7	0.992692	1.01031
0.774277	0.965426		8	1.0037	0.993574
			half_cycle	orig_sp/s	transformed_sp/s
Inc/dec_orig_stim	Inc/dec_transformed_stim		1	0.32142	1.40962
0.862546	1.02504		2	0.972451	1.89143
0.905394	0.818787		3	1.21998	1.4462
0.847896	0.956955		4	1.06225	1.20029
0.837907	1.07861		5	1.05207	0.984647
0.821958	1.03409		6	0.996334	0.875521
0.821551	0.750431		7	0.964877	0.972496
0.697915	0.904144		8	0.924476	0.967048
0.756933	0.955805
