# Supplementary figures and images for: Adaptation in cone photoreceptors contributes to an unexpected insensitivity of primate On parasol retinal ganglion cells to spatial structure in natural images
Source: eLife journal article supplement (doi:10.7554/elife.70611), 2022-03-14

## B. Modeled cone responses

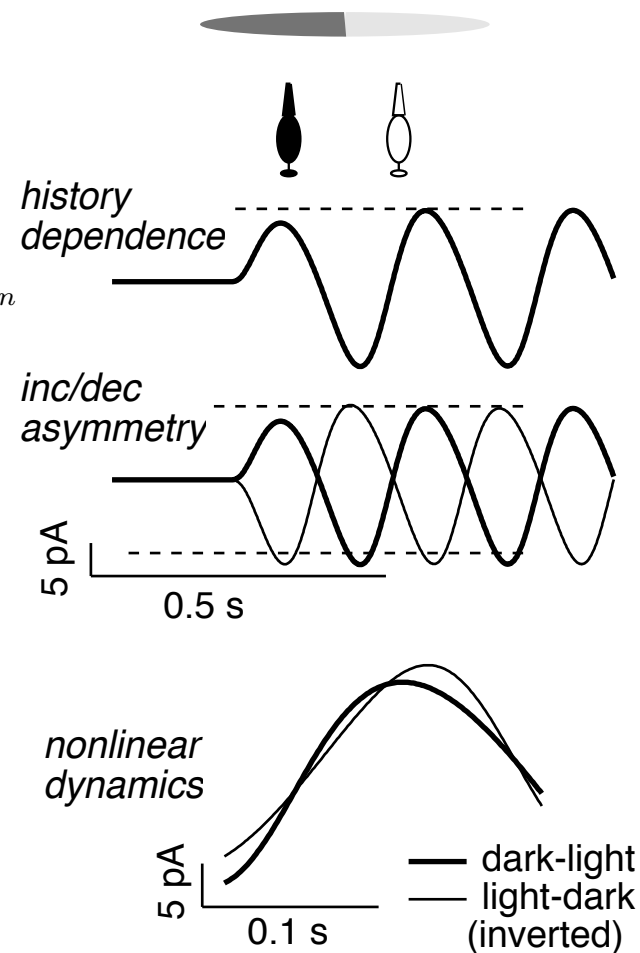

Supplement: supp [file elife-70611-supp-v1.zip]

$P_{\text{correct}}$

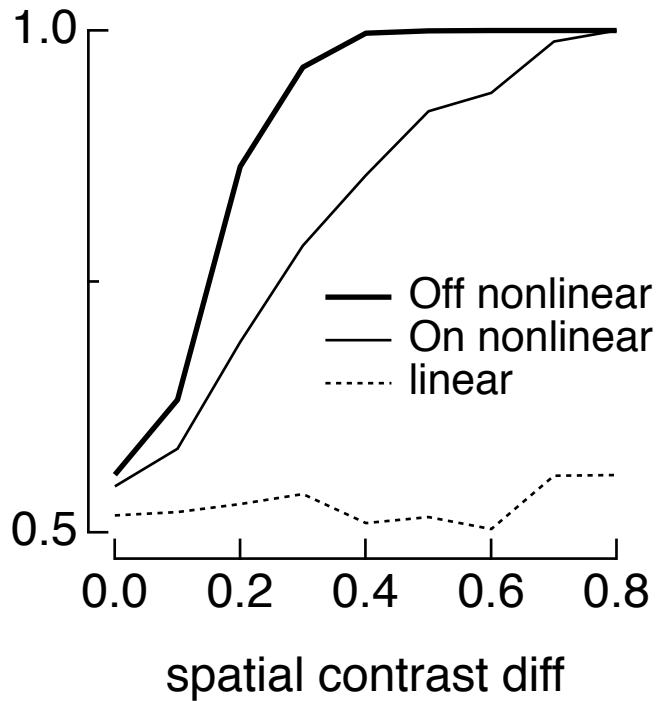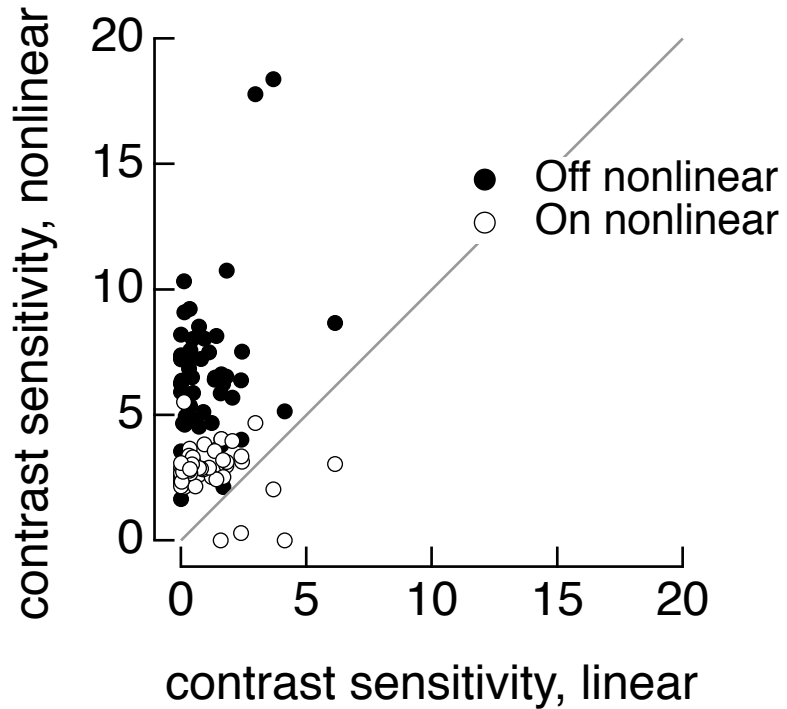

Supplement: supp [file elife-70611-supp-v1.zip]

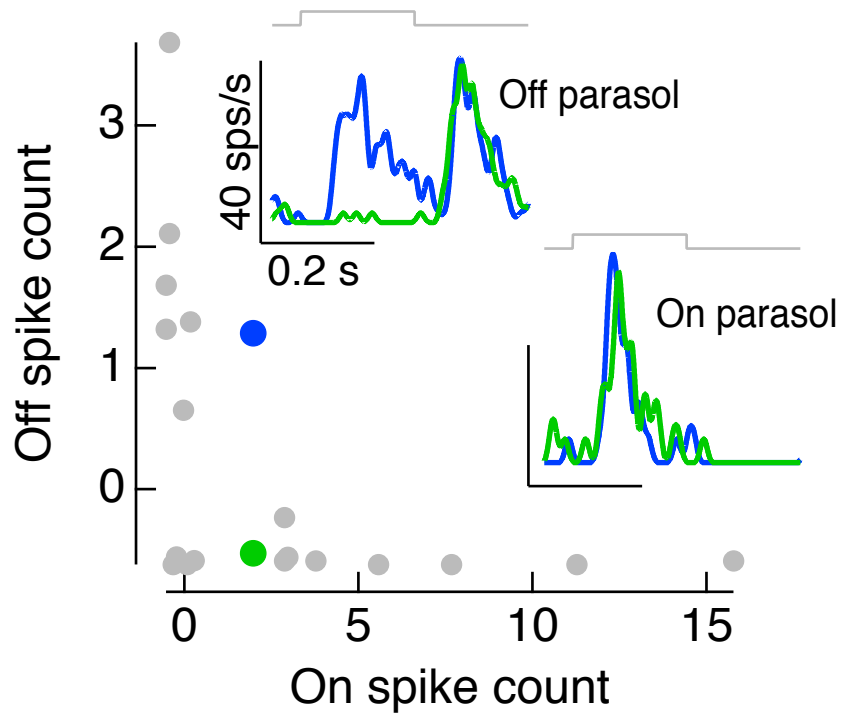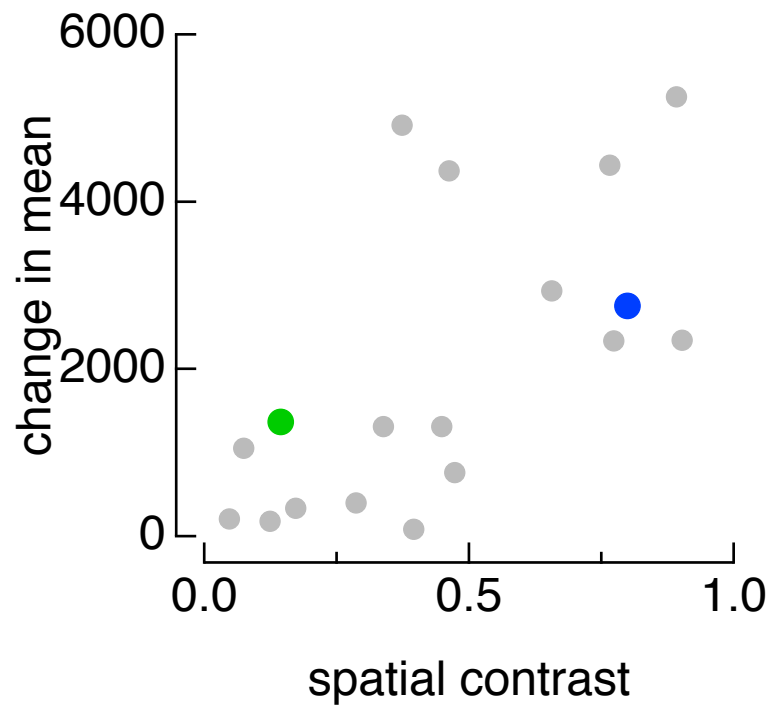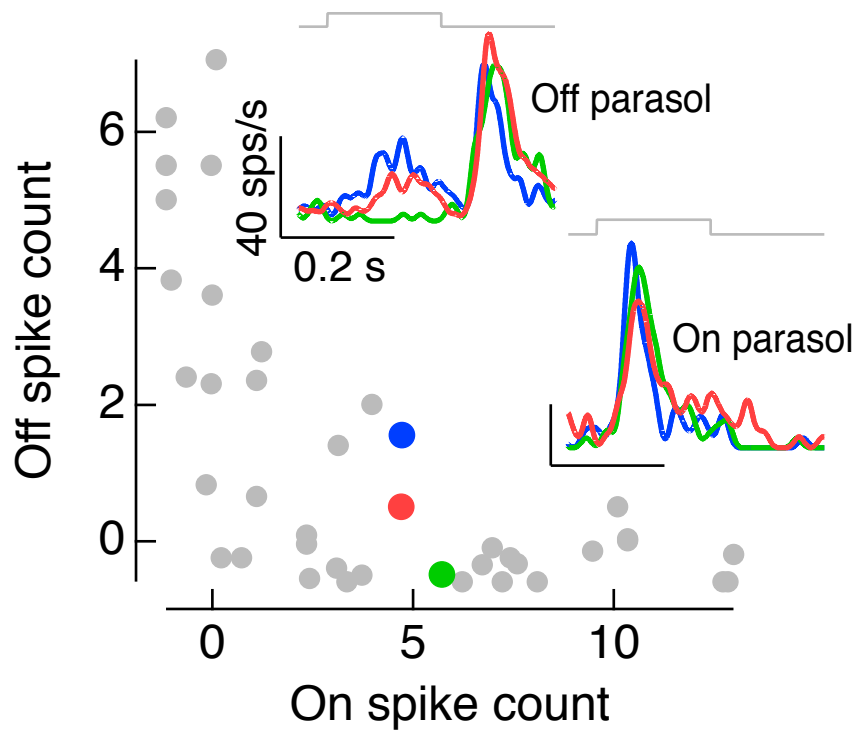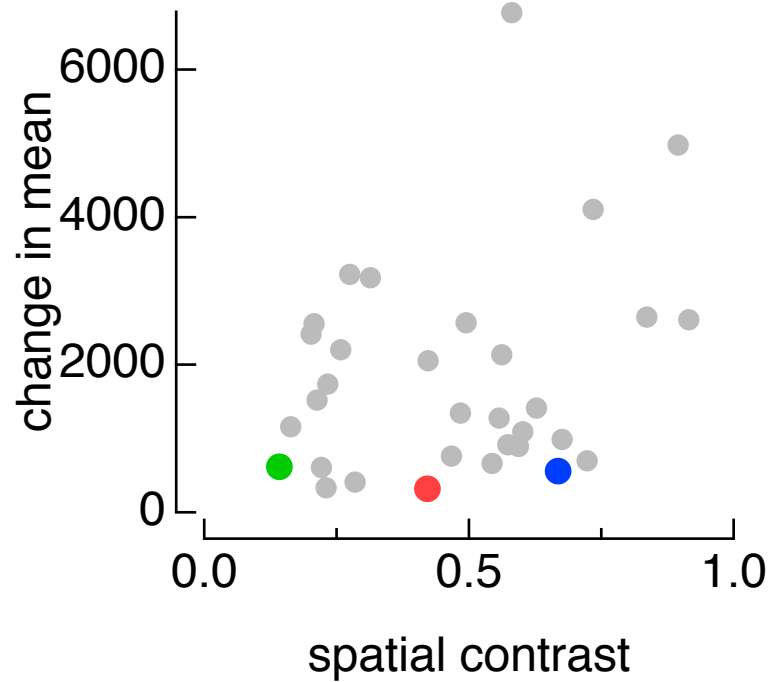

Supplement: supp [file elife-70611-supp-v1.zip]

A. Excitatory input

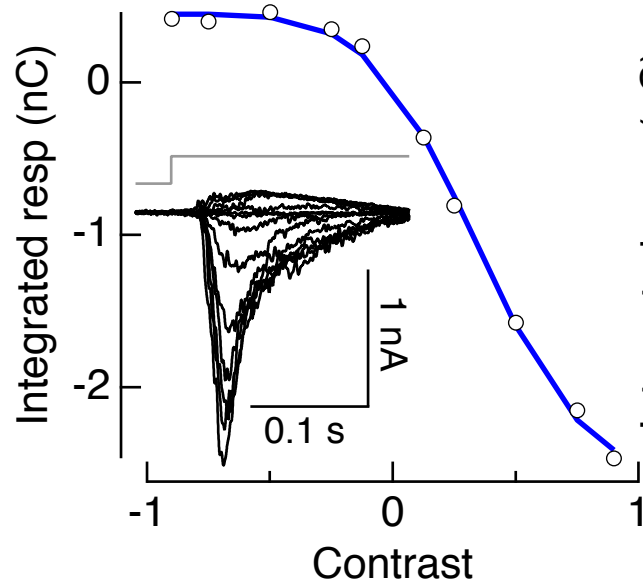

B. Inhibitory input

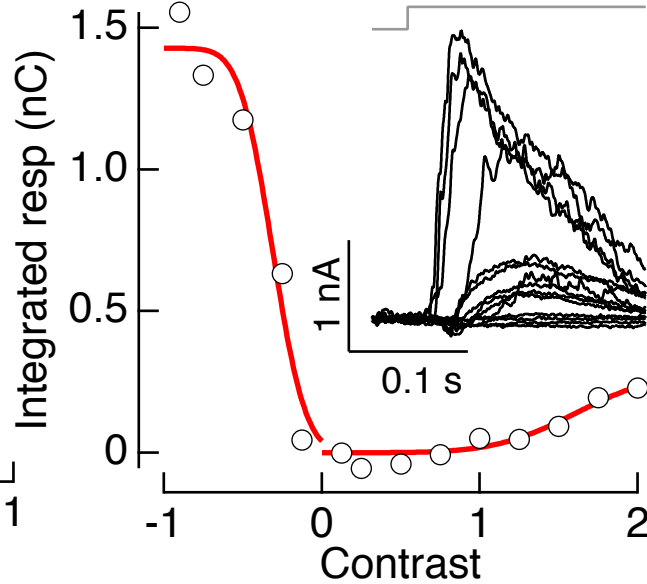

C. Average fits

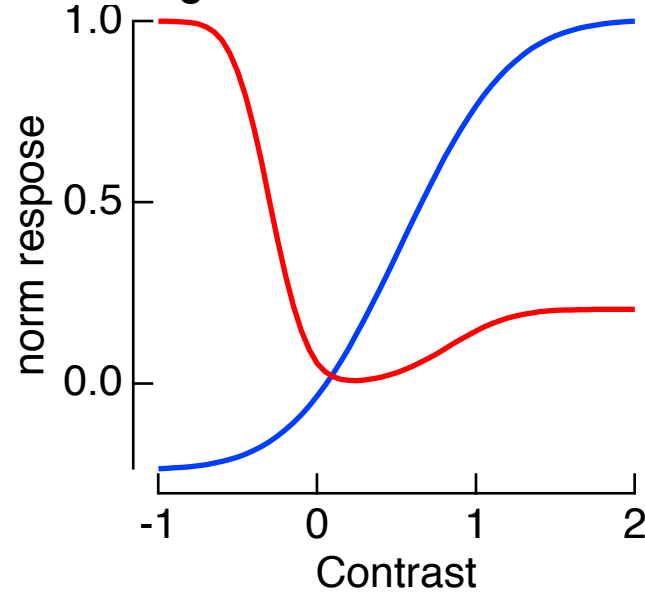

Supplement: supp [file elife-70611-supp-v1.zip]

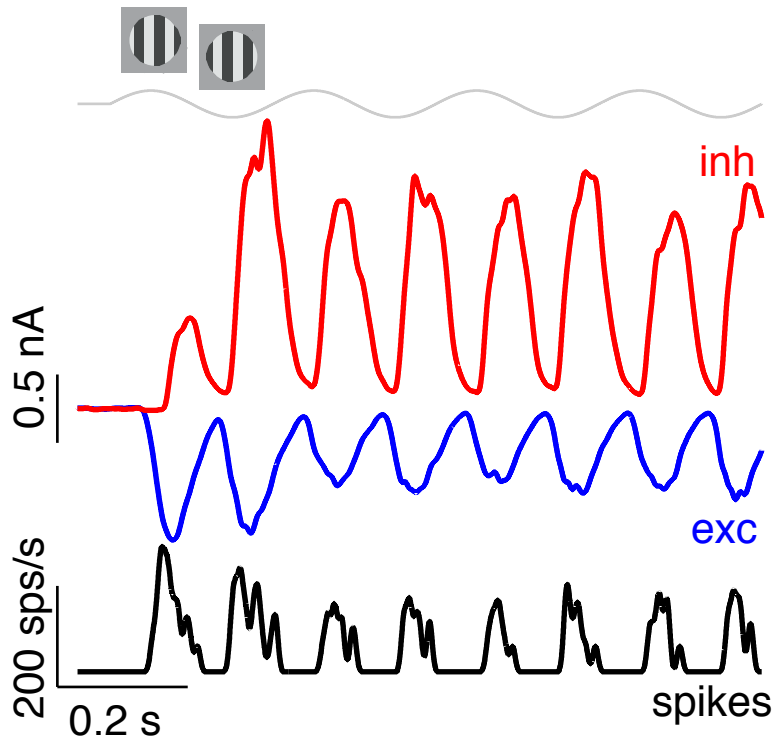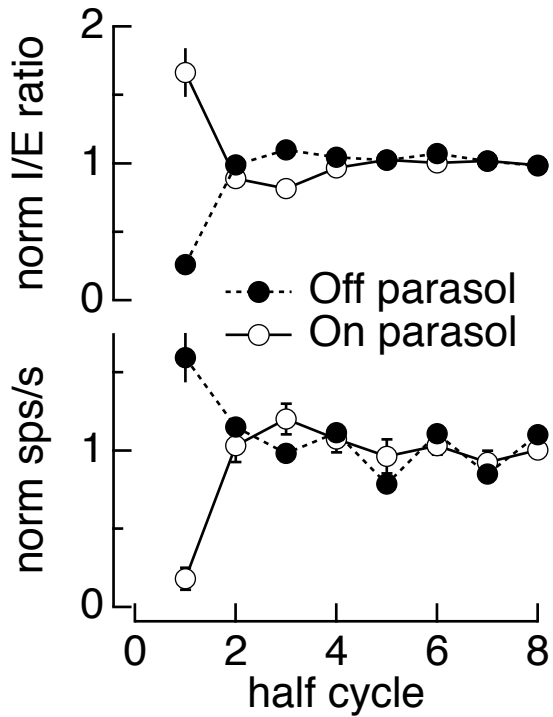

Supplement: supp [file elife-70611-supp-v1.zip]

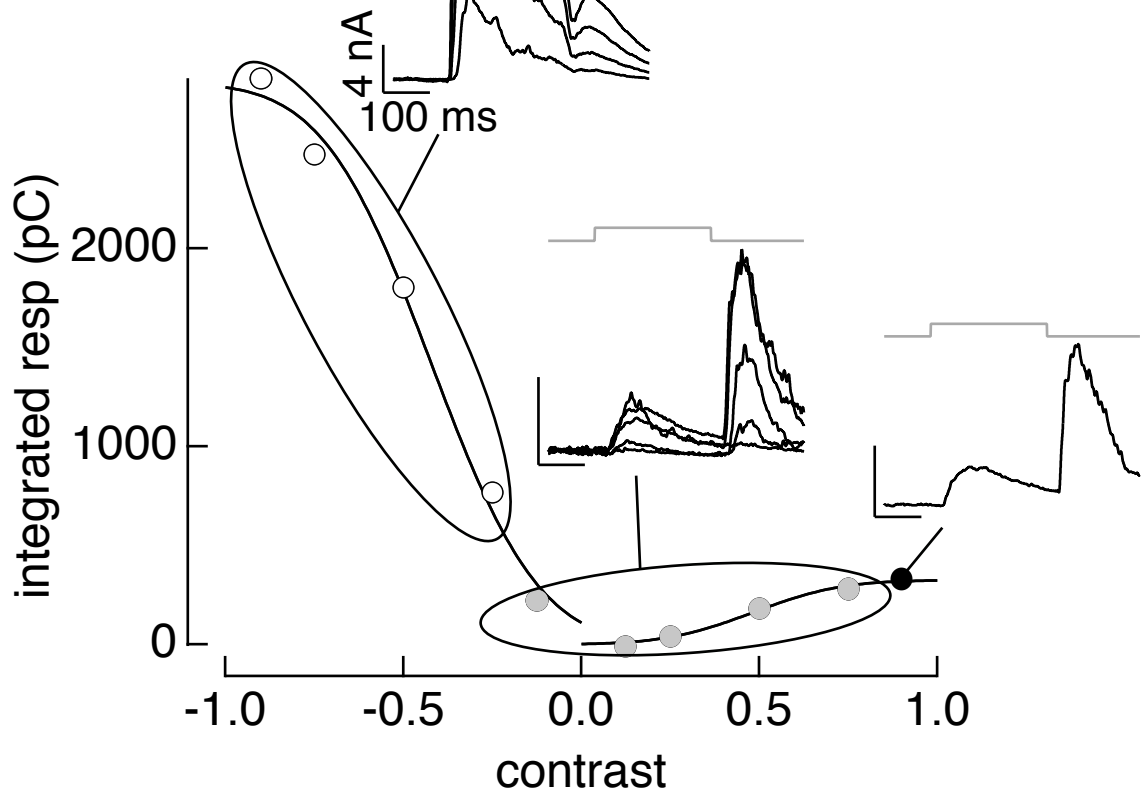

Supplement: supp [file elife-70611-supp-v1.zip]
